# Supplementary material for: Deep-blue fluorophores with imidazoacridine acceptors: enhancing photostability and two-photon fluorescence using structural constraint
Source: Royal Society of Chemistry journal article supplement (doi:10.1039/d0tc05241h), 2021-01-01
Supplement: d0tc05241h1.pdf [file d0tc05241h1.pdf]

## Supporting Information for

### **Deep-Blue Fluorophores with Imidazoacridine Acceptors: Enhancing Photostability and Two-Photon Fluorescence using Structural Constraint**

By Ethan R. Sauvé, Christopher M. Tonge and Zachary M. Hudson\*

*Department of Chemistry, The University of British Columbia, 2036 Main Mall, Vancouver, British Columbia, Canada, V6T 1Z1.*

*Tel: +1-604-822-3266; Fax: +1-604-822-2847; e-mail: zhudson@chem.ubc.ca.*

## Table of Contents

|                                     |     |
|-------------------------------------|-----|
| Additional Figures.....             | S3  |
| Additional Tables .....             | S9  |
| X-ray Crystallography Methods ..... | S12 |
| References.....                     | S21 |

## Additional Figures

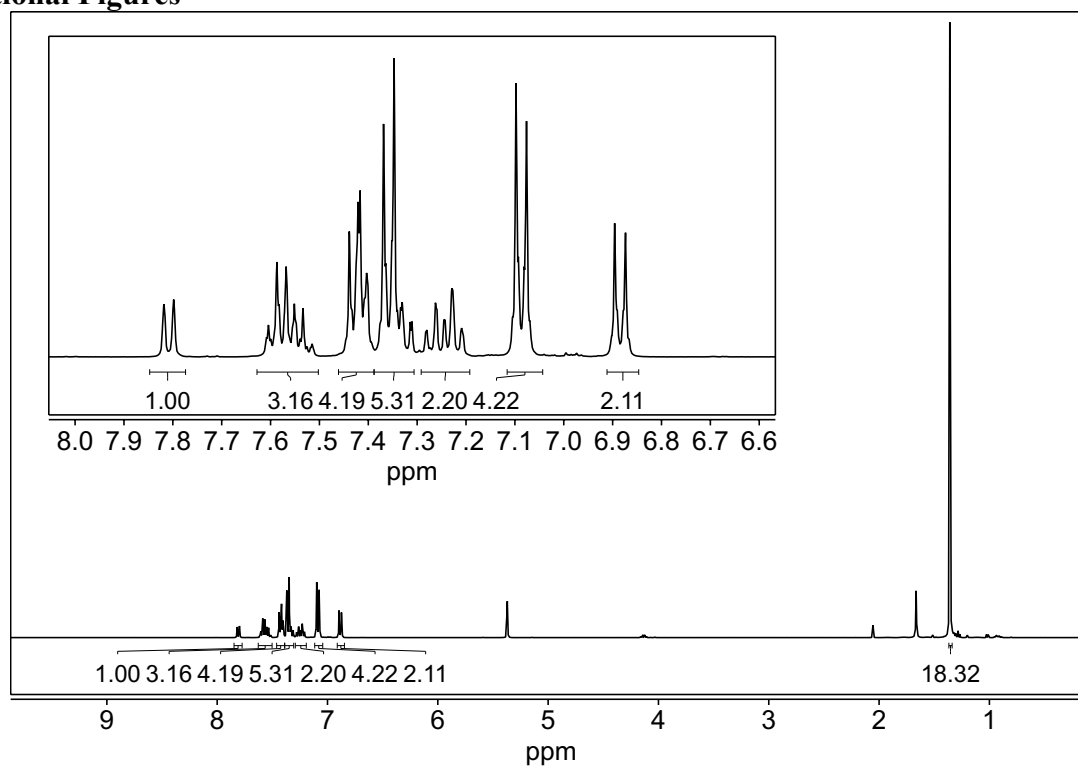

**Figure S1**  $^1\text{H}$  NMR spectrum of **tBuTPA-PBI** in methylene chloride- $d_2$ .

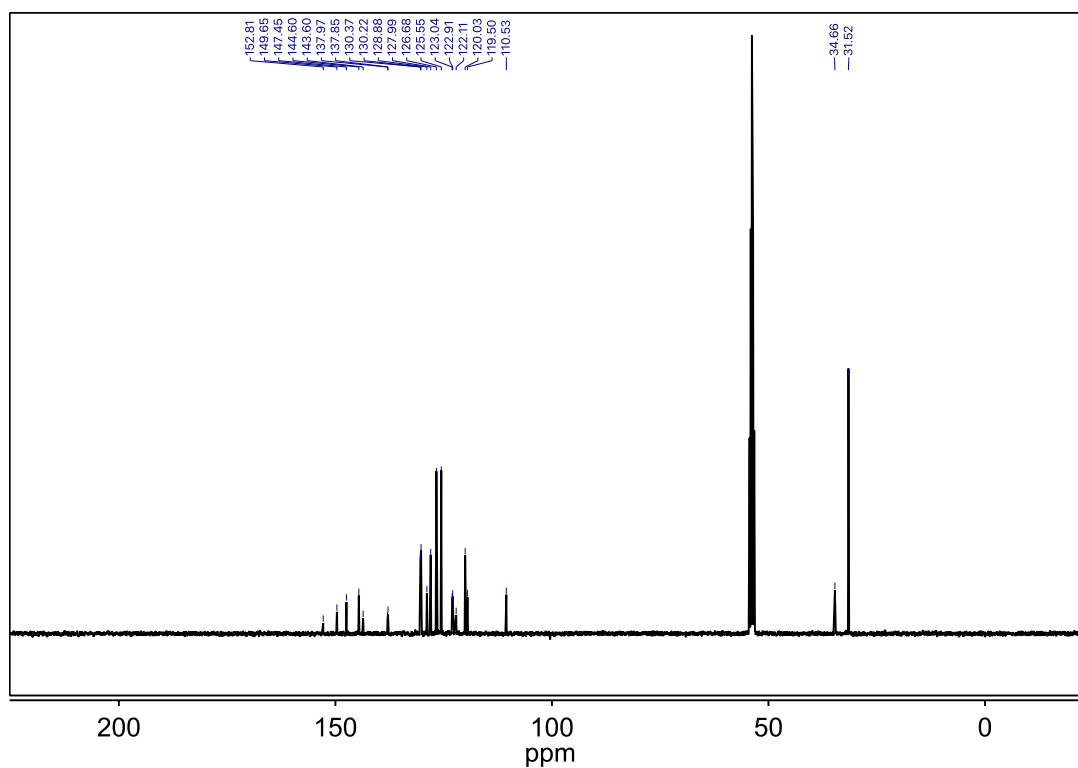

**Figure S2**  $^{13}\text{C}\{^1\text{H}\}$  NMR spectrum of **tBuTPA-PBI** in methylene chloride- $d_2$ .







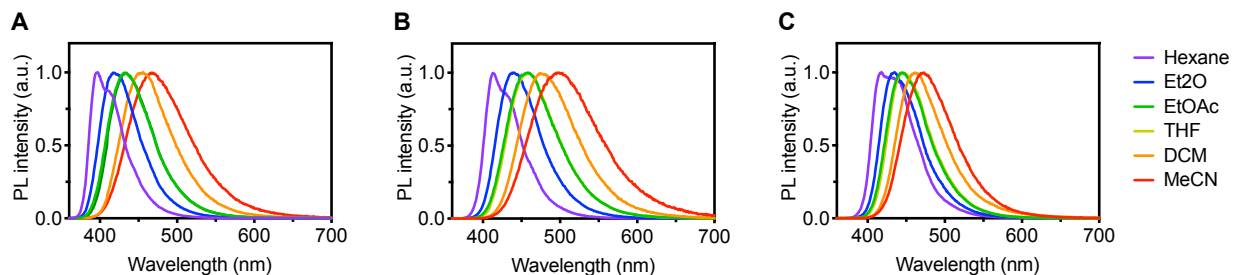

**Figure S6** Emission spectra showing solvatochromic shifts in various solvents, where (A) is **tBuTPA-PBI**, (B) is **tBuTPA-IMAC**, (C) is **HMAT-IMAC**.

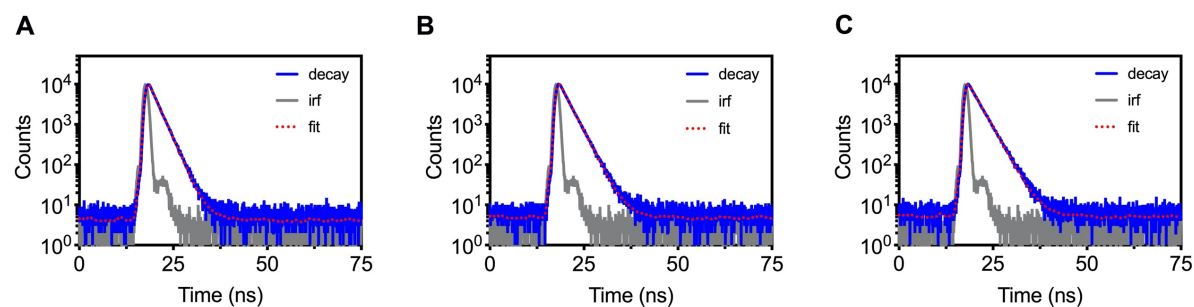

**Figure S7:** PL decay curves of (A) **tBuTPA-PBI**, (B) **tBuTPA-IMAC**, and (C) **HMAT-IMAC** measured as a solution in toluene at 300 K.

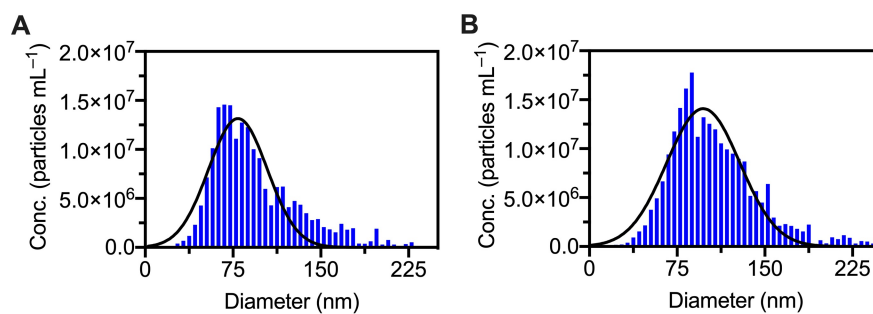

**Figure S8:** Size distribution of polymer dots of (A) **tBuTPA-PBI** and (B) **tBuTPA-IMAC** in aqueous solution (blue) with curve fit (solid black line) at  $0.25 \mu\text{g mL}^{-1}$ .

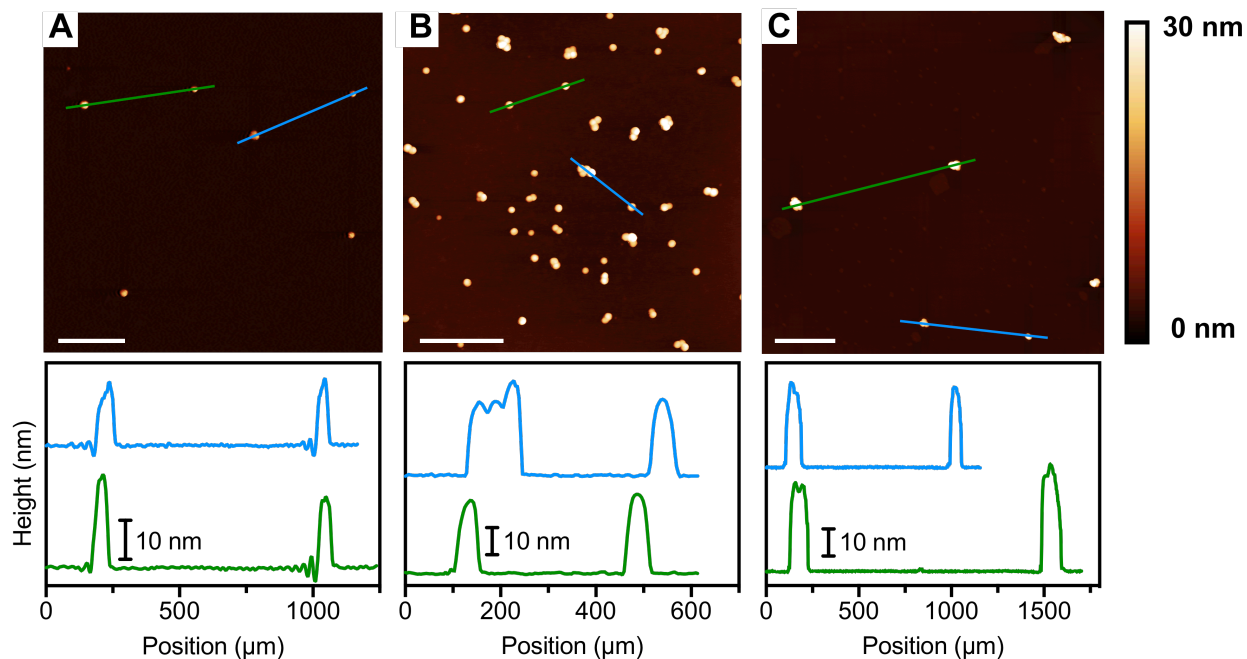

**Figure S9:** AFM height images of polymer dots of (A) **tBuTPA-PBI**, (B) **tBuTPA-IMAC**, and (C) **HMAT-IMAC** in aqueous solution cast on mica (scale bar = 0.5  $\mu\text{m}$ ). Selected height profiles for the lines indicated in the image are shown below.

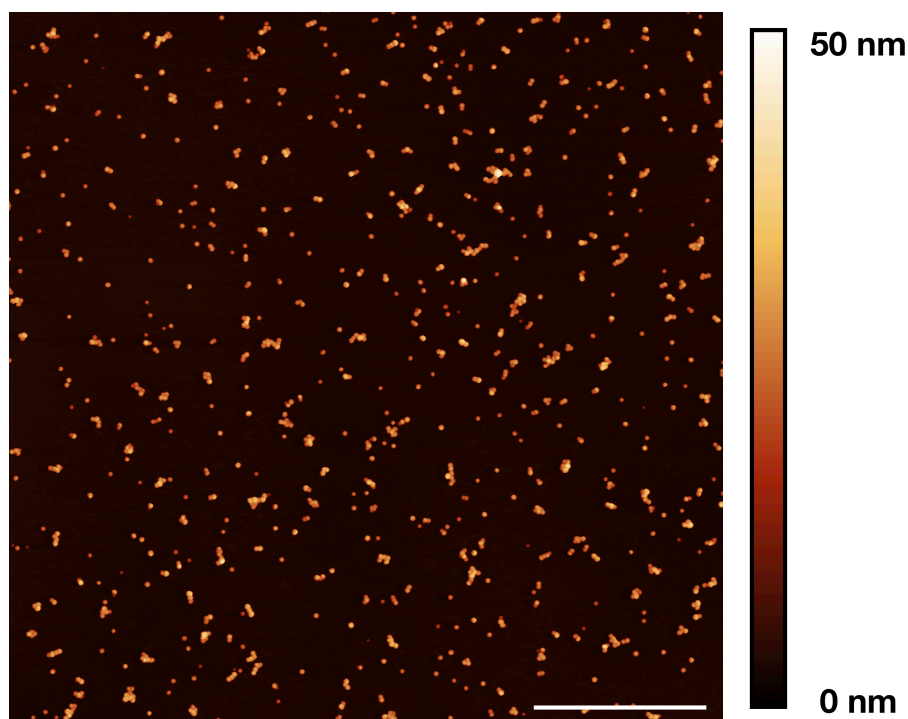

**Figure S10:** Large area AFM height image of polymer dots of **tBuTPA-IMAC** in aqueous solution cast on mica (scale bar = 1.5  $\mu\text{m}$ ). Many small sphere-shaped objects can be observed (average diameter = 53 nm, standard deviation = 22 nm).

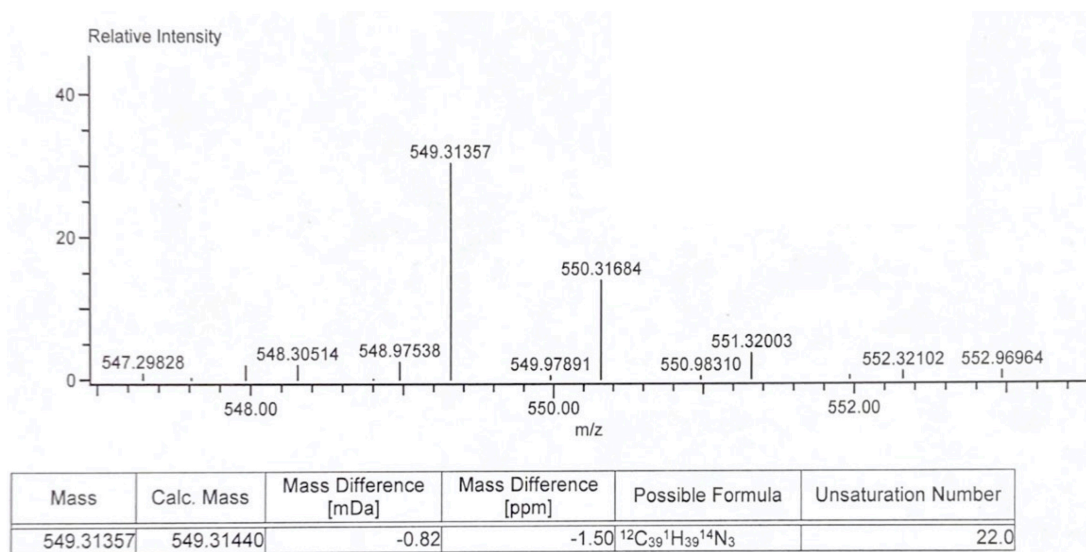

**Figure S11: Mass spectrum of tBuTPA-PBI.**

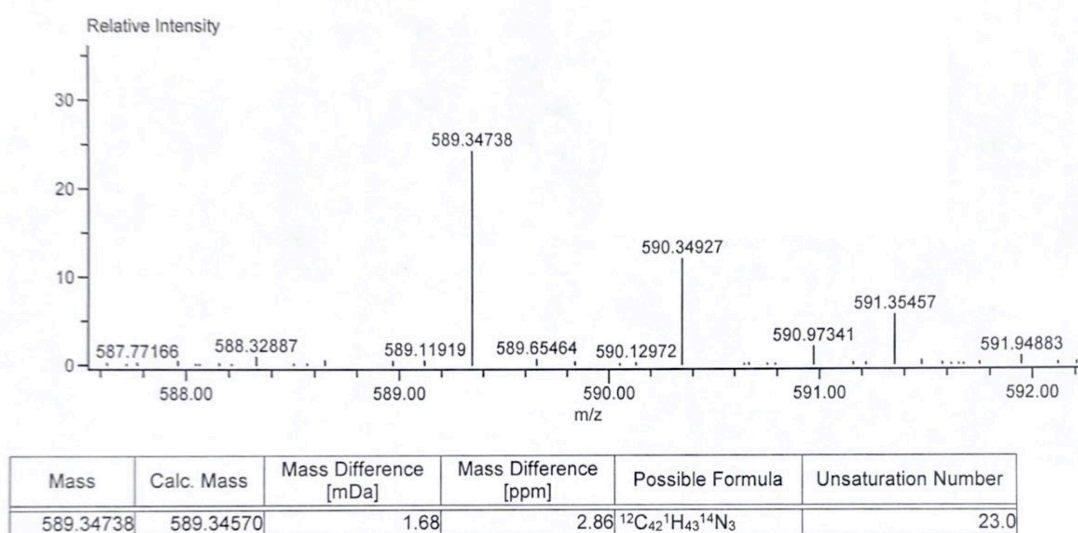

**Figure S12: Mass spectrum of tBuTPA-IMAC.**

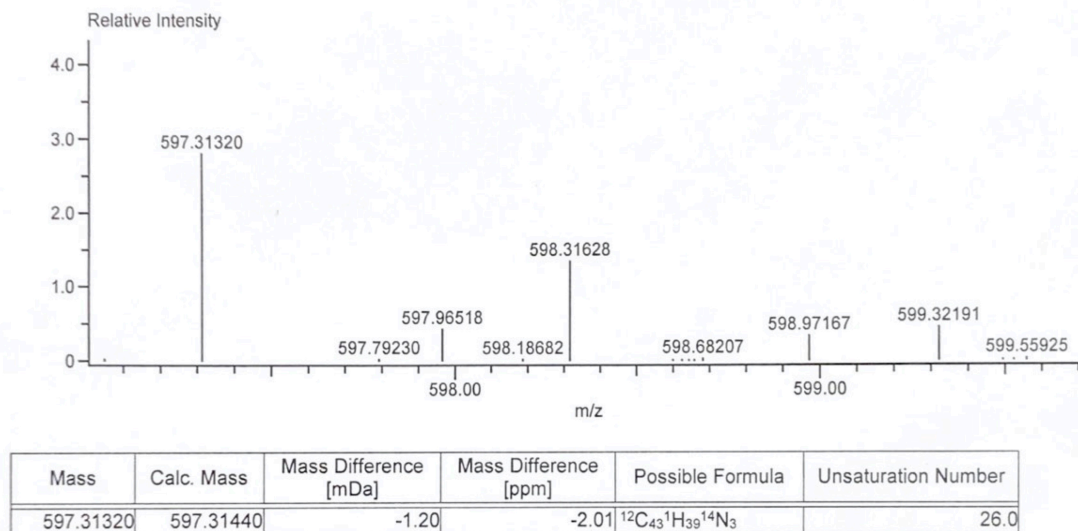

**Figure S13:** Mass spectrum of HMAT-IMAC.

**Table S1** Calculated and experimental electronic properties of the series of IMAC compounds.

| Entry              | $E_{1/2}^{\text{ox}[a]}$ | $E_{1/2}^{\text{red}[a]}$ | HOMO (eV) |                   | LUMO (eV) |                   | $E_g$ (eV) |                   |
|--------------------|--------------------------|---------------------------|-----------|-------------------|-----------|-------------------|------------|-------------------|
|                    |                          |                           | Calc.     | Exp. <sup>b</sup> | Calc.     | Exp. <sup>b</sup> | Calc.      | Exp. <sup>c</sup> |
| <b>tBuTPA-PBI</b>  | 0.49                     | —                         | −5.04     | −5.29             | −0.88     | —                 | 3.58       | 3.16              |
| <b>tBuTPA-IMAC</b> | 0.49                     | −2.66                     | −5.11     | −5.29             | −1.03     | −2.14             | 3.50       | 3.08              |
| <b>HMAT-IMAC</b>   | 0.44                     | −2.60                     | −5.03     | −5.24             | −1.05     | −2.20             | 3.39       | 3.05              |

<sup>a</sup>In DMF relative to  $\text{FeCp}^{0/+}$ .

<sup>b</sup>Calculated from  $E_{1/2}^{\text{ox}}$  relative to the  $\text{FeCp}^{0/+}$  HOMO level (−4.80 eV).

<sup>c</sup>Calculated from the LUMO level and the optical energy gap,  $E_g$ .  $E_g$  was determined from the intersection point of the normalized emission and absorption spectra.

**Table S2** TD-DFT results for the HOMO to LUMO transition in IMAC compounds.

| Entry              | Total Energy (Hartree) <sup>a</sup> | $\lambda$ (nm) <sup>b</sup> | $\Delta E$ (eV) <sup>b</sup> | $f^b$  |
|--------------------|-------------------------------------|-----------------------------|------------------------------|--------|
| <b>tBuTPA-PBI</b>  | −1671.97                            | 346                         | 3.58                         | 0.9645 |
| <b>tBuTPA-IMAC</b> | −1788.55                            | 354                         | 3.50                         | 0.8898 |
| <b>HMAT-IMAC</b>   | −1824.28                            | 349                         | 3.39                         | 0.5653 |

<sup>a</sup>Calculated total energy of the optimized structures in  $S_0$ . <sup>b</sup>Calculated with TDA-DFT on neutral condition optimized structures in  $S_1$ .

**Table S3** Cartesian Coordinates [Å] of the Optimized Structures for **tBuTPA-PBI** in  $S_0$ .

| Atom | X       | Y       | Z        | Atom | X        | Y        | Z        |
|------|---------|---------|----------|------|----------|----------|----------|
| C    | 2.64565 | 3.38667 | −1.33001 | H    | −9.38639 | −0.60266 | −0.72632 |
| C    | 3.68055 | 3.73792 | −0.45917 | N    | −4.33144 | −1.29336 | −1.82208 |
| C    | 4.06779 | 2.77405 | 0.4824   | H    | −5.54866 | 3.47946  | 2.79926  |
| C    | 3.45392 | 1.53298 | 0.56072  | H    | −4.40426 | 2.34138  | 4.68662  |

|   |          |          |          |   |          |          |          |
|---|----------|----------|----------|---|----------|----------|----------|
| C | 2.03217  | 2.13875  | -1.2765  | H | -3.45277 | 0.07087  | 4.36438  |
| C | 2.42396  | 1.19563  | -0.32477 | H | -3.65685 | -1.06119 | 2.16185  |
| C | 3.81682  | -1.36201 | -0.77713 | H | 4.86411  | 2.99809  | 1.18811  |
| N | 1.80531  | -0.07529 | -0.25793 | C | 4.38247  | 5.09621  | -0.49946 |
| C | 2.61106  | -1.22537 | -0.08729 | H | 3.77115  | 0.81252  | 1.30906  |
| C | 4.61531  | -2.4864  | -0.59132 | H | 4.1312   | -0.58003 | -1.46218 |
| C | 4.2419   | -3.52264 | 0.26838  | H | 1.29631  | -2.15724 | 1.34055  |
| C | 3.02486  | -3.37113 | 0.94781  | H | 0.48129  | -2.07339 | -1.43599 |
| C | 2.22685  | -2.24836 | 0.78778  | H | -0.01843 | 1.66501  | 0.61944  |
| H | 2.30745  | 4.08792  | -2.08606 | H | 1.24023  | 1.893    | -1.97814 |
| H | 5.54418  | -2.54886 | -1.14903 | H | -5.7131  | 2.35351  | 0.58756  |
| C | 5.09091  | -4.77605 | 0.48588  | H | -7.60158 | 0.37175  | 0.70467  |
| H | 2.69097  | -4.14382 | 1.63614  | C | 4.20381  | 5.80491  | 0.85312  |
| H | -1.97499 | -2.27204 | -1.64296 | H | 3.14289  | 5.97338  | 1.06915  |
| C | -1.53693 | -1.42183 | -1.12971 | H | 4.70929  | 6.77832  | 0.84299  |
| C | -0.16252 | -1.30475 | -1.02006 | H | 4.62428  | 5.21969  | 1.67778  |
| C | 0.41103  | -0.19502 | -0.37972 | C | 5.88159  | 4.88962  | -0.77051 |
| C | -0.44233 | 0.79419  | 0.12955  | H | 6.35414  | 4.27648  | 0.00414  |
| C | -1.81844 | 0.67593  | 0.00773  | H | 6.40121  | 5.85531  | -0.79522 |
| H | -2.44485 | 1.47107  | 0.39837  | H | 6.03977  | 4.39207  | -1.73384 |
| C | -2.39462 | -0.44043 | -0.6124  | C | 3.82     | 6.00681  | -1.59401 |
| C | -3.83467 | -0.61262 | -0.81517 | H | 2.75526  | 6.21725  | -1.44142 |
| C | -6.70741 | -1.75004 | -2.49318 | H | 3.94516  | 5.57004  | -2.5914  |
| C | -8.02455 | -1.51606 | -2.12703 | H | 4.35096  | 6.9653   | -1.58423 |
| C | -8.34308 | -0.75905 | -0.9863  | C | 6.3775   | -4.7552  | -0.34344 |
| C | -7.35498 | -0.20627 | -0.18094 | H | 6.16825  | -4.71156 | -1.41839 |
| C | -5.69697 | -1.20557 | -1.69502 | H | 6.95136  | -5.66957 | -0.15553 |
| C | -6.0364  | -0.43601 | -0.56449 | H | 7.01687  | -3.9042  | -0.08208 |
| C | -5.23018 | 1.85964  | 1.42589  | C | 5.47821  | -4.88085 | 1.97     |
| N | -4.82357 | -0.06154 | -0.00613 | H | 6.06556  | -4.0105  | 2.28328  |
| C | -4.69363 | 0.58373  | 1.25055  | H | 6.08107  | -5.78054 | 2.14398  |
| C | -5.12989 | 2.48604  | 2.6648   | H | 4.59683  | -4.94027 | 2.61728  |
| C | -4.48691 | 1.84815  | 3.72227  | C | 4.28061  | -6.01897 | 0.08326  |
| C | -3.95118 | 0.57483  | 3.54108  | H | 3.99634  | -5.97495 | -0.974   |
| C | -4.06074 | -0.0647  | 2.31141  | H | 3.36248  | -6.11438 | 0.67252  |
| H | -6.45233 | -2.3404  | -3.36797 | H | 4.87395  | -6.9281  | 0.24006  |
| H | -8.82956 | -1.92764 | -2.72964 |   |          |          |          |

**Table S4** Cartesian Coordinates [Å] of the Optimized Structures for **tBuTPA-IMAC** in  $S_0$ .

| Atom | X       | Y       | Z        | Atom | X        | Y        | Z        |
|------|---------|---------|----------|------|----------|----------|----------|
| C    | 3.16276 | 3.53008 | -1.13727 | H    | -4.90792 | 0.27949  | 4.95886  |
| C    | 4.14335 | 3.88391 | -0.20671 | H    | -2.70044 | -0.49518 | 4.08282  |
| C    | 4.53335 | 2.8946  | 0.70697  | H    | -2.38287 | -0.7809  | 1.66043  |
| C    | 3.97229 | 1.62636 | 0.70289  | C    | -6.82521 | 0.55838  | 0.68288  |
| C    | 2.60354 | 2.25609 | -1.1665  | C    | -6.80408 | 2.06858  | 0.35854  |
| C    | 2.99616 | 1.28782 | -0.24093 | H    | -5.86614 | 2.35238  | -0.12943 |

|   |          |          |          |   |          |          |          |
|---|----------|----------|----------|---|----------|----------|----------|
| C | 4.51265  | -1.18459 | -0.76897 | H | -6.90546 | 2.65832  | 1.27709  |
| N | 2.43164  | -0.01023 | -0.25754 | H | -7.62936 | 2.32314  | -0.31623 |
| C | 3.28224  | -1.13176 | -0.11232 | C | -8.16936 | 0.20746  | 1.32988  |
| C | 5.3545   | -2.28082 | -0.60746 | H | -8.19938 | -0.83963 | 1.64707  |
| C | 5.00207  | -3.36979 | 0.19393  | H | -8.98276 | 0.37383  | 0.61727  |
| C | 3.76013  | -3.30166 | 0.84104  | H | -8.38236 | 0.84191  | 2.19544  |
| C | 2.91811  | -2.20825 | 0.70505  | H | 5.28866  | 3.11923  | 1.45618  |
| H | 2.82596  | 4.25081  | -1.87535 | C | 4.78436  | 5.27159  | -0.15454 |
| H | 6.30139  | -2.27813 | -1.13763 | H | 4.28941  | 0.88579  | 1.43142  |
| C | 5.89915  | -4.59401 | 0.38306  | H | 4.81195  | -0.35944 | -1.40866 |
| H | 3.44101  | -4.11812 | 1.48433  | H | 1.96868  | -2.18225 | 1.23205  |
| H | -1.19211 | -2.304   | -1.88094 | H | 1.24248  | -2.01238 | -1.56306 |
| C | -0.81331 | -1.45909 | -1.31438 | H | 0.5043   | 1.61802  | 0.61335  |
| C | 0.55027  | -1.28914 | -1.14373 | H | 1.8538   | 2.00977  | -1.91294 |
| C | 1.05056  | -0.18288 | -0.43912 | C | 4.22885  | 6.20724  | -1.23135 |
| C | 0.13677  | 0.75019  | 0.07513  | H | 4.41648  | 5.82356  | -2.24072 |
| C | -1.22603 | 0.57801  | -0.10753 | H | 4.71502  | 7.18622  | -1.15457 |
| H | -1.91087 | 1.32236  | 0.28932  | H | 3.15014  | 6.36428  | -1.11757 |
| C | -1.72828 | -0.53757 | -0.79005 | C | 4.5155   | 5.90743  | 1.21916  |
| C | -3.1534  | -0.71183 | -1.07684 | H | 3.43971  | 6.01943  | 1.39443  |
| C | -5.93503 | -1.3944  | -3.14437 | H | 4.97613  | 6.90127  | 1.27579  |
| C | -7.2541  | -1.12713 | -2.79554 | H | 4.92617  | 5.30291  | 2.0348   |
| C | -7.60988 | -0.54057 | -1.56556 | C | 6.30156  | 5.14275  | -0.36669 |
| C | -6.64311 | -0.20375 | -0.62026 | H | 6.52356  | 4.6982   | -1.34326 |
| C | -4.94883 | -1.07069 | -2.20818 | H | 6.76768  | 4.51517  | 0.40024  |
| C | -5.34697 | -0.50315 | -0.99581 | H | 6.77743  | 6.13011  | -0.32464 |
| C | -5.64066 | 0.25533  | 1.61925  | C | 6.24938  | -4.74642 | 1.87226  |
| N | -4.20517 | -0.30027 | -0.2514  | H | 6.78888  | -3.86614 | 2.23927  |
| C | -4.36438 | -0.12802 | 1.1444   | H | 6.8863   | -5.62611 | 2.02581  |
| C | -5.78739 | 0.39572  | 3.00093  | H | 5.35388  | -4.87172 | 2.49011  |
| C | -4.74802 | 0.15342  | 3.89193  | C | 7.20593  | -4.48197 | -0.40638 |
| C | -3.5182  | -0.26876 | 3.4045   | H | 7.80037  | -3.61727 | -0.08977 |
| C | -3.33151 | -0.42008 | 2.03738  | H | 7.02475  | -4.39951 | -1.48416 |
| H | -5.6767  | -1.834   | -4.10263 | H | 7.81355  | -5.37874 | -0.24129 |
| H | -8.04563 | -1.36717 | -3.5004  | C | 5.15565  | -5.8517  | -0.09543 |
| H | -8.65989 | -0.33937 | -1.37351 | H | 4.22683  | -6.01201 | 0.46212  |
| N | -3.57426 | -1.17561 | -2.2329  | H | 5.7839   | -6.74053 | 0.04016  |
| H | -6.74907 | 0.70157  | 3.39941  | H | 4.89896  | -5.77394 | -1.15778 |

**Table S5** Cartesian Coordinates [Å] of the Optimized Structures for **HMAT-IMAC** in S<sub>0</sub>.

| Atom | X        | Y        | Z        | Atom | X       | Y        | Z        |
|------|----------|----------|----------|------|---------|----------|----------|
| C    | -3.13578 | -3.60011 | -0.99351 | H    | 4.93878 | 4.20903  | -1.63876 |
| C    | -4.48544 | -3.89656 | -0.96083 | H    | 7.32468 | 3.50325  | -1.60789 |
| C    | -5.36149 | -2.87798 | -0.63648 | H    | 8.00387 | 1.27476  | -0.88039 |
| C    | -4.92538 | -1.58487 | -0.35041 | N    | 2.89497 | 2.363    | -0.76344 |
| C    | -2.64818 | -2.32456 | -0.71295 | H    | 6.23943 | -2.92491 | 1.72539  |

|   |          |          |          |   |          |          |          |
|---|----------|----------|----------|---|----------|----------|----------|
| C | -3.5472  | -1.28787 | -0.38623 | H | 4.44861  | -3.79242 | 3.15358  |
| C | -5.99398 | -0.56704 | -0.01082 | H | 2.2189   | -2.66451 | 3.16078  |
| C | -5.38406 | 0.79154  | 0.26384  | H | 1.82902  | -0.72696 | 1.69664  |
| N | -3.07743 | 0.01904  | -0.10187 | C | 6.23429  | -0.86562 | -0.05299 |
| C | -3.99882 | 1.05024  | 0.214    | C | 6.20622  | -1.68312 | -1.36333 |
| C | -6.26866 | 1.82215  | 0.57969  | H | 5.25462  | -1.55137 | -1.88821 |
| C | -5.83724 | 3.10791  | 0.84557  | H | 6.33653  | -2.75069 | -1.15089 |
| C | -4.47853 | 3.3563   | 0.79229  | H | 7.01125  | -1.3564  | -2.03139 |
| C | -3.55258 | 2.36032  | 0.48588  | C | 7.59681  | -1.05525 | 0.62266  |
| H | -2.42888 | -4.38491 | -1.24468 | H | 7.63422  | -0.55417 | 1.59499  |
| H | -4.84542 | -4.89684 | -1.18193 | H | 8.38862  | -0.64028 | -0.00814 |
| C | -1.1458  | -2.14303 | -0.77615 | H | 7.83726  | -2.11315 | 0.76436  |
| H | -7.3316  | 1.60409  | 0.616    | H | -6.42603 | -3.08839 | -0.60252 |
| H | -6.5425  | 3.89732  | 1.08743  | C | -6.75721 | -1.03957 | 1.24537  |
| H | -4.11655 | 4.35967  | 0.99424  | H | -6.07609 | -1.12813 | 2.09768  |
| C | -2.09542 | 2.77177  | 0.46219  | H | -7.22452 | -2.01564 | 1.08091  |
| H | 0.5341   | 2.8376   | 0.29086  | H | -7.54964 | -0.33452 | 1.5156   |
| C | 0.16169  | 1.83664  | 0.10235  | C | -6.97118 | -0.4478  | -1.20048 |
| C | -1.20491 | 1.59126  | 0.13558  | H | -7.44482 | -1.40907 | -1.42279 |
| C | -1.69539 | 0.29423  | -0.13439 | H | -6.4428  | -0.11335 | -2.09884 |
| C | -0.75886 | -0.71679 | -0.44313 | H | -7.76846 | 0.2711   | -0.98787 |
| C | 0.59998  | -0.42195 | -0.46258 | C | -1.70457 | 3.32849  | 1.84807  |
| H | 1.29911  | -1.20993 | -0.72342 | C | -1.89555 | 3.86155  | -0.6129  |
| C | 1.09438  | 0.84588  | -0.17904 | C | -0.6554  | -2.47922 | -2.20078 |
| C | 2.51003  | 1.20138  | -0.28226 | C | -0.48287 | -3.09464 | 0.24334  |
| C | 5.22635  | 3.22117  | -1.29284 | H | -0.8511  | 4.18539  | -0.65835 |
| C | 6.55532  | 2.81334  | -1.2717  | H | -2.50915 | 4.74273  | -0.39985 |
| C | 6.94868  | 1.53004  | -0.84522 | H | -2.17626 | 3.48258  | -1.60068 |
| C | 6.01169  | 0.59631  | -0.40723 | H | -1.11445 | -1.80801 | -2.93343 |
| C | 4.26962  | 2.30265  | -0.85146 | H | -0.91129 | -3.50753 | -2.47447 |
| C | 4.70487  | 1.04645  | -0.4237  | H | 0.4315   | -2.37757 | -2.28079 |
| C | 5.07869  | -1.35483 | 0.83977  | H | 0.60714  | -2.99293 | 0.23631  |
| N | 3.58657  | 0.34624  | -0.02556 | H | -0.71875 | -4.13994 | 0.02045  |
| C | 3.78955  | -0.77296 | 0.81657  | H | -0.838   | -2.87678 | 1.25603  |
| C | 5.26703  | -2.4448  | 1.69255  | H | -0.65836 | 3.64875  | 1.86449  |
| C | 4.25649  | -2.93941 | 2.50921  | H | -1.84021 | 2.56557  | 2.62139  |
| C | 3.01417  | -2.31872 | 2.50648  | H | -2.31822 | 4.19451  | 2.11455  |
| C | 2.78642  | -1.23223 | 1.6726   |   |          |          |          |

## X-ray Crystallography Methods

**(*t*BuTPA-PBI)<sub>2</sub>CuBr<sub>2</sub>.** CuBr<sub>2</sub> (2.0 mg, 0.0091 mmol) and **tBuTPA-PBI** (10.0 mg, 0.0182 mmol) were dissolved in 0.2 mL of NMP and stirred for 30 mins. The solution was then heated to 70 °C and placed under vacuum (pressure reduced to 25 torr) for 1 h to concentrate the NMP. Benzene



was added (0.5 mL) followed by hexanes (1.0 mL) and the solution was left to slowly evaporate, giving crystals suitable for X-ray diffraction analysis.

A brown tablet-shaped crystal with dimensions  $0.18 \times 0.15 \times 0.06 \text{ mm}^3$  was mounted on a mylar loop in oil. Data were collected using a Bruker APEX II area detector diffractometer equipped with a Kryoflex low-temperature device operating at  $T = 120(2) \text{ K}$ . Data were measured using  $\varphi$  and  $\omega$  scans of  $0.5^\circ$  per frame for 30 s using  $\text{MoK}\alpha$  radiation (microfocus sealed X-ray tube, 50 kV, 0.99 mA). The total number of runs and images was based on the strategy calculation from the program APEX3. The maximum resolution that was achieved was  $\Theta = 29.784^\circ$  ( $0.72 \text{ \AA}$ ). The unit cell was refined using SAINT<sup>1</sup> on 9966 reflections, 19% of the observed reflections. Data reduction, scaling and absorption corrections were performed using SAINT.<sup>1</sup> The final completeness is 100.00 % out to  $29.784^\circ$  in  $\Theta$ . A multi-scan absorption correction was performed using SADABS-2016/2<sup>2</sup> was used for absorption correction.  $wR_2(\text{int})$  was 0.0816 before and 0.0445 after correction. The ratio of minimum to maximum transmission is 0.9092. The  $\lambda/2$  correction factor is not present. The absorption coefficient  $\mu$  of this material is  $1.119 \text{ mm}^{-1}$  at this wavelength ( $\lambda = 0.71073 \text{ \AA}$ ) and the minimum and maximum transmissions are 0.855 and 0.940.

The structure was solved and the space group  $P-1$  (# 2) determined by the **XT**<sup>3</sup> structure solution program using Intrinsic Phasing methods and by using **Olex2**<sup>5</sup> as the graphical interface. The model was refined by full matrix least squares minimisation on  $F^2$  using version 2018/3 of **XL**.<sup>4</sup> The material crystallizes with three molecules of benzene in the asymmetric unit, or six in the unit cell. Additionally, there appears to be a site that is partially occupied by water, with an occupancy of  $\sim 0.18$ . All non-hydrogen atoms were refined anisotropically. Hydrogen atom positions were calculated geometrically and refined using the riding model. The value of  $Z'$  is 0.5. This means that only half of the formula unit is present in the asymmetric unit, with the other half consisting of symmetry equivalent atoms.

**(*t*BuTPA-IMAC)<sub>2</sub>CuBr<sub>2</sub>**.  $\text{CuBr}_2$  (1.9 mg, 0.0085 mmol) and **tBuTPA-IMAC** (10.0 mg, 0.0170 mmol) were dissolved in 0.2 mL of NMP and stirred for 30 mins. The solution was then heated to  $70^\circ \text{C}$  and placed under vacuum (pressure reduced to 25 torr) for 1 h to concentrate the NMP. Benzene was added (0.5 mL) followed by hexanes (1.0 mL) and the solution was left to slowly evaporate, giving crystals suitable for X-ray diffraction analysis.

Single brown prism crystals of **tBuTPA-IMAC** were recrystallised from a mixture of

benzene and hexane by slow evaporation. A suitable crystal with dimensions  $0.28 \times 0.09 \times 0.05 \text{ mm}^3$  was mounted on a mylar loop in oil. Data were collected using a Bruker APEX II area detector diffractometer equipped with an Oxford Cryosystems low-temperature device operating at  $T = 110(2) \text{ K}$ . Data were measured using  $\varphi$  and  $\omega$  scans of  $0.5^\circ$  per frame for 30 s using  $\text{MoK}\alpha$  radiation (TRIUMPH monochromator, sealed X-ray tube, 45kV, 30mA). The total number of runs and images was based on the strategy calculation from the program APEX3. The maximum resolution that was achieved was  $\Theta = 26.464^\circ$  ( $0.80 \text{ \AA}$ ). The unit cell was refined using SAINT<sup>1</sup> on 9980 reflections, 22% of the observed reflections. Data reduction, scaling and absorption corrections were performed using SAINT.<sup>1</sup> The final completeness is 100.00 % out to  $26.464^\circ$  in  $\Theta$ . A multi-scan absorption correction was performed using SADABS-2016/2<sup>2</sup> was used for absorption correction.  $wR_2(\text{int})$  was 0.0412 before and 0.0341 after correction. The ratio of minimum to maximum transmission is 0.9184. The  $\lambda/2$  correction factor is not present. The absorption coefficient  $\mu$  of this material is  $1.216 \text{ mm}^{-1}$  at this wavelength ( $\lambda = 0.71073 \text{ \AA}$ ) and the minimum and maximum transmissions are 0.864 and 0.941.

The structure was solved and the space group  $P-1$  (# 2) determined by the **XT**<sup>3</sup> structure solution program using Intrinsic Phasing methods and by using **Olex2**<sup>5</sup> as the graphical interface. The model was refined by full matrix least squares minimisation on  $F^2$  using version 2018/3 of **XL**.<sup>4</sup> The material crystallizes with one half-molecule in the asymmetric unit, with the Cu atom residing on an inversion center. The material also crystallizes with one molecule of benzene in the asymmetric unit, in addition to what appears to be a partially occupied site with solvent NMP. Unfortunately, the disorder in the NMP site appears to be either disordered or partially occupied by some other solvent molecule, presumably hexane. A stable model that accounted for both the NMP molecule and whatever else resides at that site could not be achieved, and thus the PLATON/SQUEEZE<sup>6</sup> program was used to generate a data set free from solvent at that site. Finally, one t-butyl fragment was also disordered by rotation about the C36—C39 bond. All non-hydrogen atoms were refined anisotropically. Hydrogen atom positions were calculated geometrically and refined using the riding model. The value of  $Z'$  is 0.5. This means that only half of the formula unit is present in the asymmetric unit, with the other half consisting of symmetry equivalent atoms.

**(HMAT-IMAC)<sub>2</sub>CuBr<sub>2</sub>**. CuBr<sub>2</sub> (1.2 mg, 0.0054 mmol) and **HMAT-IMAC** (6.4 mg, 0.0107

mmol) were dissolved in 0.2 mL of NMP and stirred for 30 mins. The solution was then heated to 70 °C and placed under vacuum (pressure reduced to 25 torr) for 1 h to concentrate the NMP. Benzene was added (0.4 mL) followed by layering with heptanes (1.0 mL) and the solution was left to slowly evaporate, giving crystals suitable for X-ray diffraction analysis.

A brown tablet-shaped crystal with dimensions  $0.17 \times 0.16 \times 0.06$  mm<sup>3</sup> was mounted on a mylar loop in oil. Data were collected using a Bruker APEX-II CCD diffractometer equipped with an Oxford Cryosystems low-temperature device operating at  $T = 110(2)$  K. Data were measured using  $\varphi$  and  $\omega$  scans of  $1.0^\circ$  per frame for between 5 and 20 s using CuK $\alpha$  radiation (microfocus sealed X-ray tube, 45 kV, 0.60 mA). The total number of runs and images was based on the strategy calculation from the program APEX3. The maximum resolution that was achieved was  $\Theta = 68.442^\circ$  (0.83 Å). The unit cell was refined using SAINT<sup>1</sup> on 9682 reflections, 69% of the observed reflections. Data reduction, scaling and absorption corrections were performed using SAINT.<sup>1</sup> The final completeness is 99.50 % out to  $68.442^\circ$  in  $\Theta$ . The material crystallizes as a two-component split-crystal, with an approximate ratio of 80:20 between the major and minor domains, A multi-scan absorption correction was performed using TWINABS-2012/1 (Bruker, 2012) was used for absorption correction. Final HKLF 4 output contains 117330 reflections,  $R_{int} = 0.0714$  (59258 with  $I > 3\sigma(I)$ ,  $R_{int} = 0.0621$ ). The absorption coefficient  $\mu$  of this material is 2.025 mm<sup>-1</sup> at this wavelength ( $\lambda = 1.54178$  Å) and the minimum and maximum transmissions are 0.690 and 0.886.

The structure was solved and the space group  $P-1$  (# 2) determined by the **XT**<sup>3</sup> structure solution program using Intrinsic Phasing methods and by using **Olex2**<sup>5</sup> as the graphical interface. The model was refined by full matrix least squares minimisation on  $F^2$  using version 2018/3 of **XL**,<sup>4</sup> using an HKLF4 format data set containing reflections from the major twin domain only. All non-hydrogen atoms were refined anisotropically. Hydrogen atom positions were calculated geometrically and refined using the riding model. There are two crystallographically independent half-molecules in the asymmetric unit. Each resides on a separate inversion center, generating the other half of the molecule. Additionally, there are two molecules of benzene in the asymmetric unit, or four molecules in the unit cell.

All graphic plots were produced using Mercury version 3.9. See Table S6. In addition, CCDC 2063778-2063780 contain the supplementary crystallographic data for this paper. These data are

provided free of charge by The Cambridge Crystallographic Data Centre.

**Table S6** X-ray diffraction collection data and refinement details.

| Compound                                       | (tBuTPA-PBI) <sub>2</sub> CuBr <sub>2</sub>                                            | (tBuTPA-IMAC) <sub>2</sub> CuBr <sub>2</sub>                     | (HMTA-IMAC) <sub>2</sub> CuBr <sub>2</sub>                       |
|------------------------------------------------|----------------------------------------------------------------------------------------|------------------------------------------------------------------|------------------------------------------------------------------|
| Formula                                        | C <sub>114</sub> H <sub>114.7</sub> Br <sub>2</sub> CuN <sub>6</sub> O <sub>0.35</sub> | C <sub>90</sub> H <sub>92</sub> Br <sub>2</sub> CuN <sub>6</sub> | C <sub>98</sub> H <sub>90</sub> Br <sub>2</sub> CuN <sub>6</sub> |
| <i>D</i> <sub>calc.</sub> / g cm <sup>-3</sup> | 1.252                                                                                  | 1.133                                                            | 1.359                                                            |
| $\mu$ /mm <sup>-1</sup>                        | 1.119                                                                                  | 1.216                                                            | 2.025                                                            |
| Formula Weight                                 | 1797.77                                                                                | 1481.05                                                          | 1575.11                                                          |
| Colour                                         | brown                                                                                  | brown                                                            | brown                                                            |
| Shape                                          | tablet                                                                                 | prism                                                            | tablet                                                           |
| Size/mm <sup>3</sup>                           | 0.18×0.15×0.06                                                                         | 0.28×0.09×0.05                                                   | 0.17×0.16×0.06                                                   |
| <i>T</i> /K                                    | 120(2)                                                                                 | 110(2)                                                           | 110(2)                                                           |
| Crystal System                                 | triclinic                                                                              | triclinic                                                        | triclinic                                                        |
| Space Group                                    | <i>P</i> -1                                                                            | <i>P</i> -1                                                      | <i>P</i> -1                                                      |
| <i>a</i> /Å                                    | 10.0664(5)                                                                             | 12.0933(16)                                                      | 11.6745(4)                                                       |
| <i>b</i> /Å                                    | 13.6796(9)                                                                             | 12.3626(16)                                                      | 12.3767(4)                                                       |
| <i>c</i> /Å                                    | 17.6000(9)                                                                             | 16.665(2)                                                        | 28.6479(9)                                                       |
| $\alpha$ /°                                    | 83.395(2)                                                                              | 77.350(4)                                                        | 82.965(2)                                                        |
| $\beta$ /°                                     | 83.856(2)                                                                              | 71.246(4)                                                        | 82.068(2)                                                        |
| $\gamma$ /°                                    | 84.458(2)                                                                              | 67.770(4)                                                        | 70.418(2)                                                        |
| <i>V</i> /Å <sup>3</sup>                       | 2385.0(2)                                                                              | 2170.3(5)                                                        | 3849.8(2)                                                        |
| <i>Z</i>                                       | 1                                                                                      | 1                                                                | 2                                                                |
| <i>Z</i> '                                     | 0.5                                                                                    | 0.5                                                              | 1                                                                |
| Wavelength/Å                                   | 0.71073                                                                                | 0.71073                                                          | 1.54178                                                          |
| Radiation type                                 | MoK $\alpha$                                                                           | MoK $\alpha$                                                     | CuK $\alpha$                                                     |
| $\theta$ <sub>min</sub> /°                     | 1.504                                                                                  | 1.791                                                            | 1.562                                                            |
| $\theta$ <sub>max</sub> /°                     | 29.784                                                                                 | 26.464                                                           | 68.442                                                           |
| Measured Refl.                                 | 51254                                                                                  | 46110                                                            | 14016                                                            |
| Independent Refl.                              | 13531                                                                                  | 8939                                                             | 14016                                                            |
| Reflections with <i>I</i> > 2( <i>I</i> )      | 10091                                                                                  | 7336                                                             | 12044                                                            |
| <i>R</i> <sub>int</sub>                        | 0.0470                                                                                 | 0.0270                                                           | 0.071                                                            |
| Parameters                                     | 575                                                                                    | 487                                                              | 983                                                              |
| Restraints                                     | 0                                                                                      | 0                                                                | 0                                                                |
| Largest Peak                                   | 0.628                                                                                  | 0.409                                                            | 0.862                                                            |
| Deepest Hole                                   | -0.404                                                                                 | -0.810                                                           | -0.637                                                           |
| GooF                                           | 1.033                                                                                  | 1.031                                                            | 1.038                                                            |
| <i>wR</i> <sub>2</sub> (all data)              | 0.1074                                                                                 | 0.0825                                                           | 0.1288                                                           |
| <i>wR</i> <sub>2</sub>                         | 0.0976                                                                                 | 0.0775                                                           | 0.1244                                                           |
| <i>R</i> <sub>1</sub> (all data)               | 0.0650                                                                                 | 0.0432                                                           | 0.0522                                                           |
| <i>R</i> <sub>1</sub>                          | 0.0412                                                                                 | 0.0315                                                           | 0.0458                                                           |

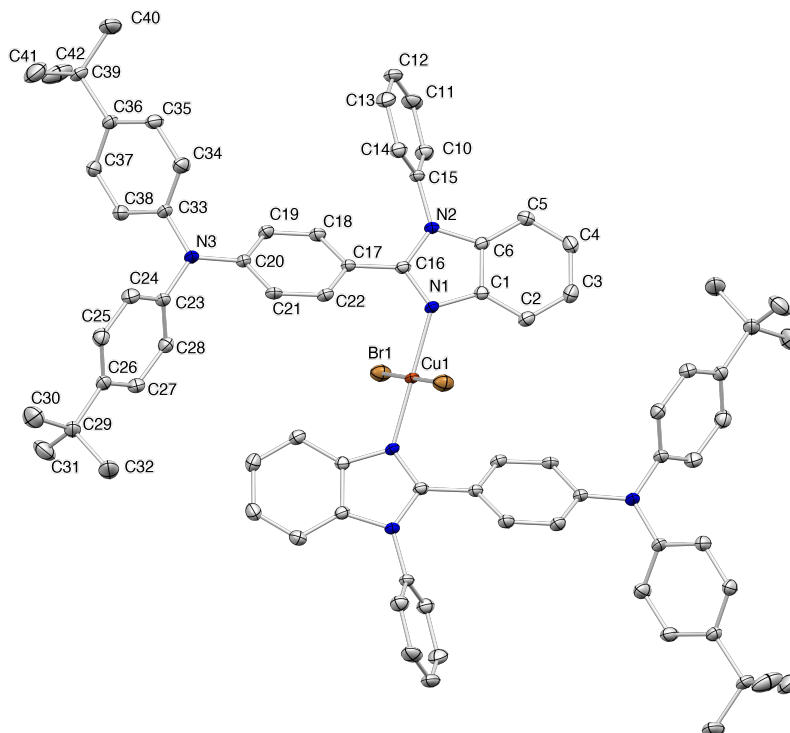

**Figure S14** Solid-state structure of  $(\text{tBuTPA-PBI})_2\text{CuBr}_2$ , depicted with 50 % thermal ellipsoids. Hydrogen atoms and solvent benzene molecules removed for clarity. Selected bond lengths (Å): Cu1–N1 1.9518(14), N1–C16 1.322(2), N3–C20 1.404(2). Selected angles (°): N1–Cu1–Br1 90.11(4). Selected torsion angles (°): N1–C16–C17–C18 150.39(18), C16–N2–C15–C10 125.9(2).

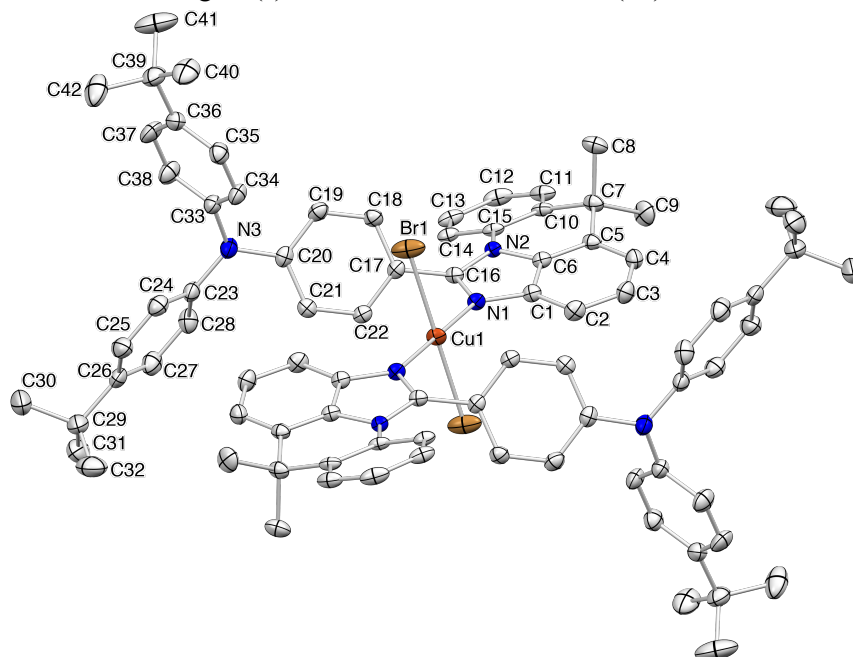

**Figure S15** Solid-state structure of  $(\text{tBuTPA-IMAC})_2\text{CuBr}_2$ , depicted with 50 % thermal ellipsoids. Hydrogen atoms and solvent benzene molecules removed for clarity. Selected bond lengths (Å): Cu1–N1 1.9751(13), N1–C16 1.329(2), N3–C20 1.406(2). Selected angles (°): N1–Cu1–Br1 89.55(4). Selected torsion angles (°): N1–C16–C17–C18 121.06(19), C16–N2–C15–C10 125.9(2).

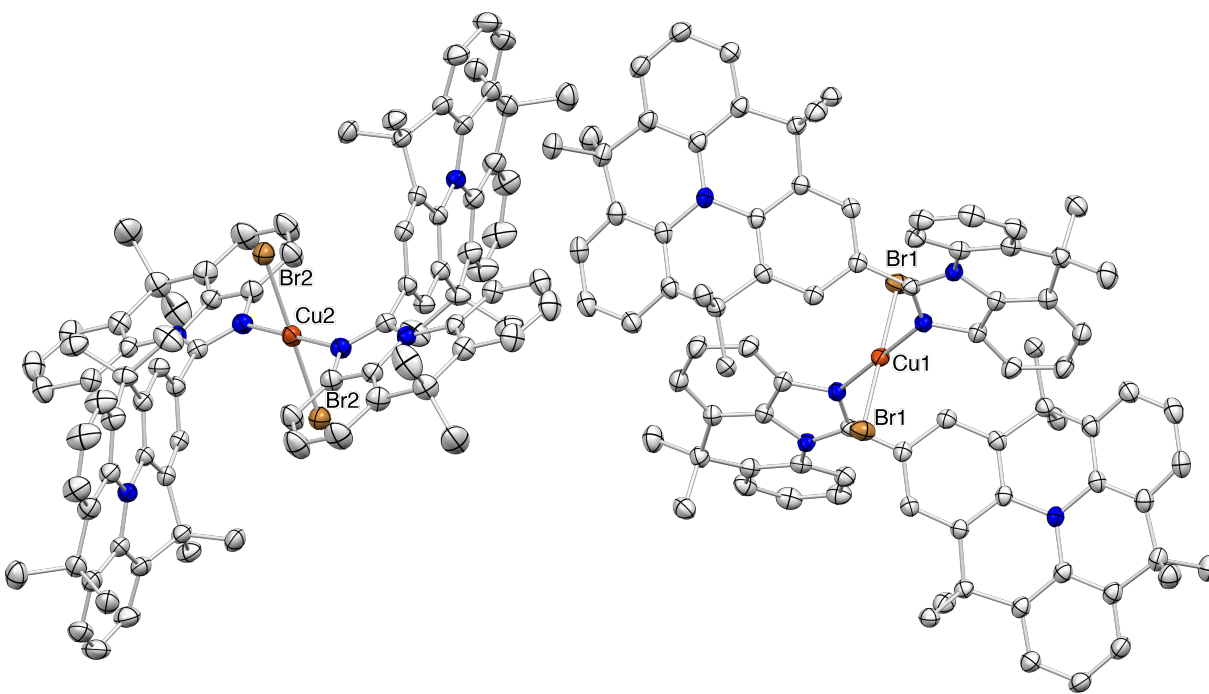

**Figure S16** Solid-state structure of  $(\text{HMAT-IMAC})_2\text{CuBr}_2$ , depicted with 50 % thermal ellipsoids. Hydrogen atoms and solvent benzene molecules removed for clarity.

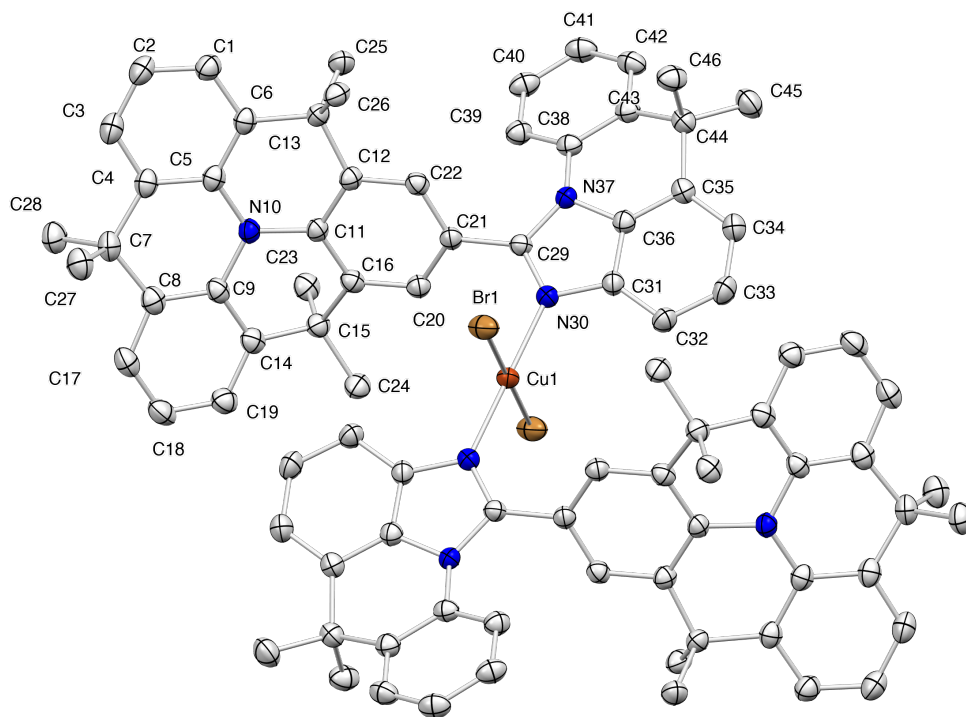

**Figure S17** Solid-state structure of the first  $(\text{HMAT-IMAC})_2\text{CuBr}_2$  conformation, depicted with 50 % thermal ellipsoids. Hydrogen atoms and solvent benzene molecules removed for clarity.

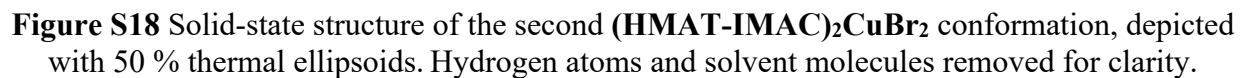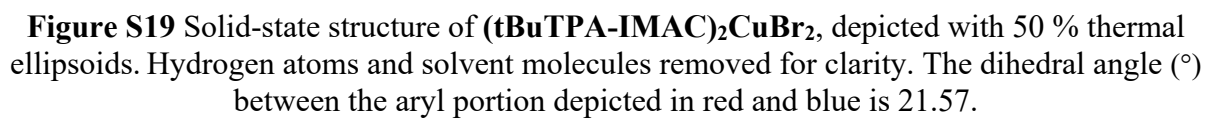

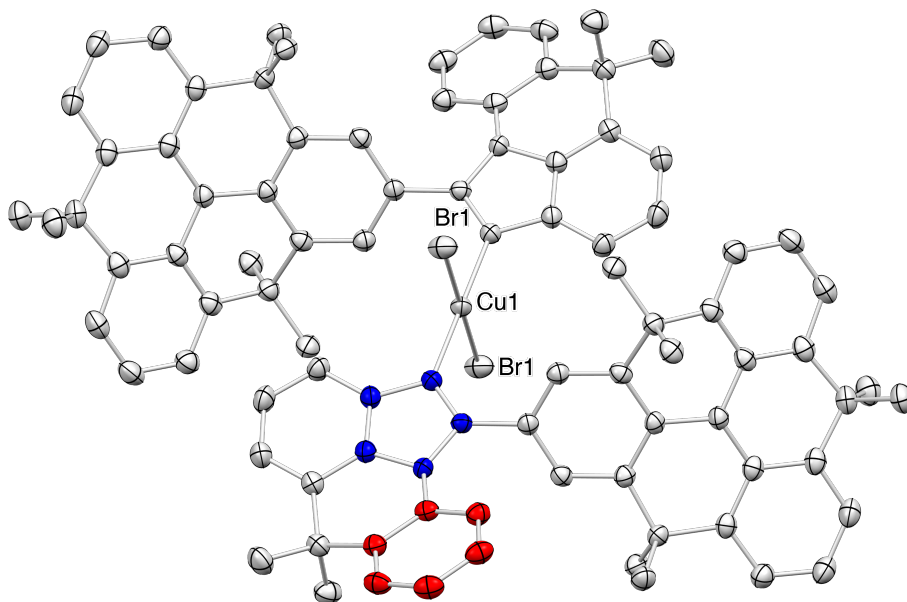

**Figure S20** Solid-state structure of the first **(HMT-IMAC)<sub>2</sub>CuBr<sub>2</sub>** conformation, depicted with 50 % thermal ellipsoids. Hydrogen atoms and solvent molecules removed for clarity. The dihedral angle (°) between the aryl portion depicted in red and blue is 24.86.

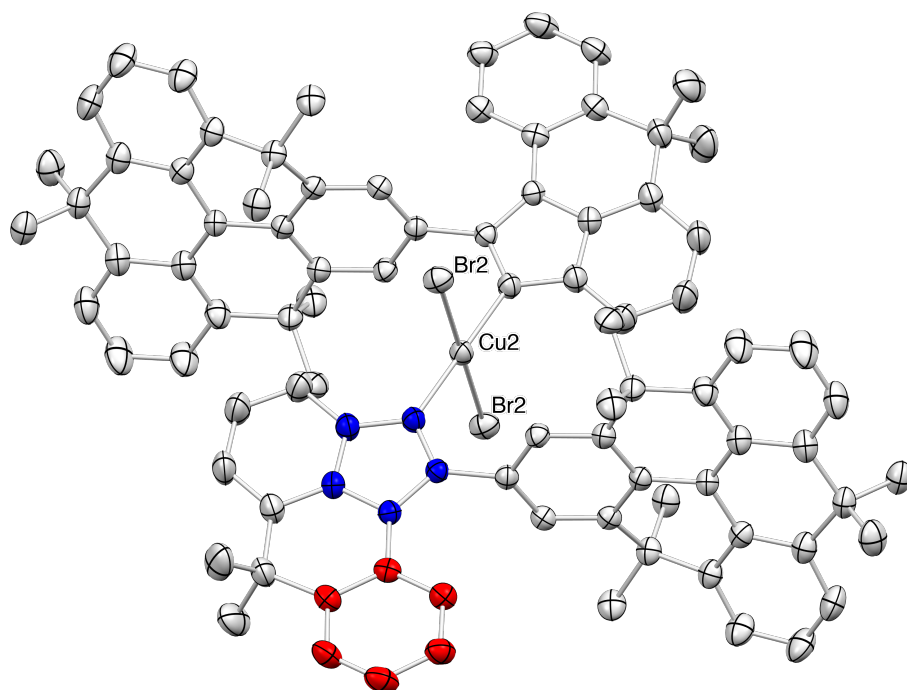

**Figure S21** Solid-state structure of the second **(HMT-IMAC)<sub>2</sub>CuBr<sub>2</sub>** conformation, depicted with 50 % thermal ellipsoids. Hydrogen atoms and solvent molecules removed for clarity. The dihedral angle (°) between the aryl portion depicted in red and blue is 6.91.



## References

- (1) Bruker-AXS SAINT version 2013.8. No Title. 2013, p Bruker-AXS Madison, WI 53711 USA.
- (2) Bruker-AXS SADABS version 2016.2. No Title. 2016, p Bruker-AXS, Madison, WI 53711, USA.
- (3) Sheldrick, G. M. SHELXT - Integrated Space-Group and Crystal-Structure Determination. *Acta Crystallogr. Sect. A Found. Crystallogr.* **2015**, *71*, 3–8.
- (4) Sheldrick, G. M. Crystal Structure Refinement with SHELXL. *Acta Crystallogr. Sect. C, Struct. Chem.* **2015**, *71*, 3–8.
- (5) Dolomanov, O. V; Bourhis, L. J.; Gildea, R. J.; Howard, J. A. K.; Puschmann, H. OLEX2 : A Complete Structure Solution, Refinement and Analysis Program. *J. Appl. Crystallogr.* **2009**, *42*, 339–341.
- (6) Spek, A. L. PLATON SQUEEZE: A Tool for the Calculation of the Disordered Solvent Contribution to the Calculated Structure Factors. *Acta Crystallogr. Sect. C Struct. Chem.* **2015**, *71*, 9–18.
